# Supplementary material for: Two CuCN hybrid networks with unusual topology tuned by terpyridine ligands
Source: Royal Society of Chemistry journal article supplement (doi:10.1039/b904512k), 2009-01-01
Supplement: b904512k.pdf [file b904512k.pdf]

*Electronic Supplementary Information (ESI)*

*for*

**Two CuCN hybrid networks with unusual topology tuned by terpyridine ligands**

*Xiao-Ping Zhou, Shi-Hong Lin, Dan Li\* and Ye-Gao Yin\**

Department of Chemistry, Shantou University, Guangdong 515063, People's Republic of China,  
E-mail: dli@stu.edu.cn; ygyin@stu.edu.cn;

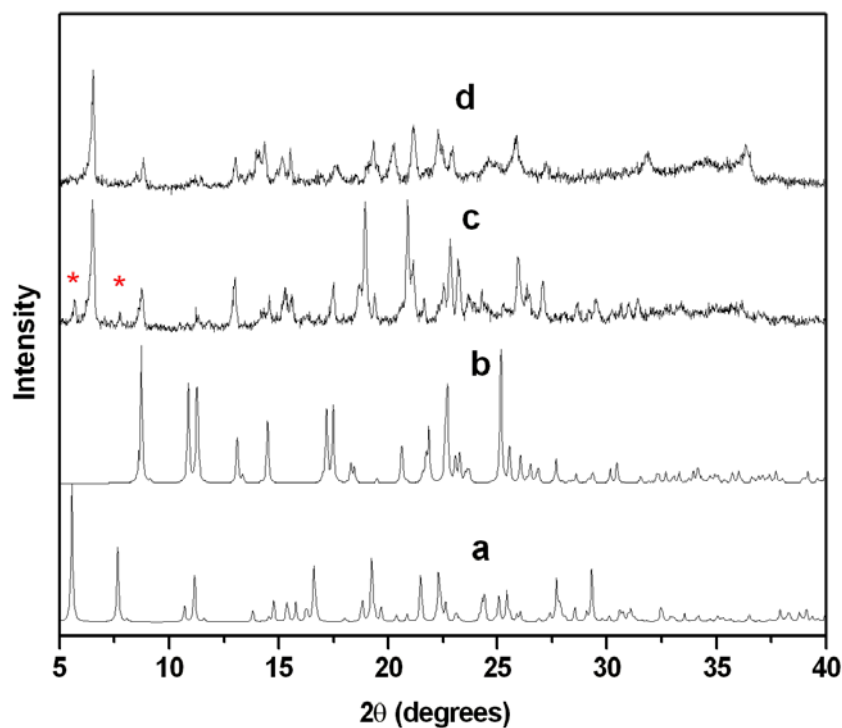

Fig. S1 The simulated patterns of compound **1** (a), compound **2** (b); the as-synthesized powder patterns for CdSO<sub>4</sub> (c, the peaks labeled with red star shown that there are presenting minor phase of compound **1**) and ZnCO<sub>3</sub> (d). PXRD patterns were measured with Cu K $\alpha$  radiation using a Bruker-AXS D8 Advance powder diffractometer.
